# Supplementary material for: A unified framework for finding differentially expressed genes from microarray experiments
Source: PubMed Central journal article supplement (PMC2099446; doi:10.1186/1471-2105-8-347), 2007-09-18
Supplement: 1471-2105-8-347-S2.pdf [file 1471-2105-8-347-S2.pdf]

## Differentially expressed genes for Leukemia dataset

Rank Gene Name  
1 CST3 Cystatin C (amyloid angiopathy and cerebral hemorrhage)  
2 CYSTATIN A  
3 PLECKSTRIN  
4 DF D component of complement (adipsin)  
5 NF-IL6-beta protein mRNA  
6 CD33 CD33 antigen (differentiation antigen)  
7 PPBP Connective tissue activation peptide III  
8 Azurocidin gene  
9 GLUTATHIONE S-TRANSFERASE, MICROSOMAL  
10 Epb72 gene exon 1  
11 PFC Properdin P factor, complement  
12 RNS2 Ribonuclease 2 (eosinophil-derived neurotoxin; EDN)  
13 MANB Mannosidase alpha-B (lysosomal)  
14 Epican, Alt. Splice 11  
15 Pre-B cell enhancing factor (PBEF) mRNA  
16 CD36 CD36 antigen (collagen type I receptor, thrombospondin receptor)  
17 Zyxin  
18 PACE Paired basic amino acid cleaving enzyme (furin, membrane associated receptor protein)  
19 INTERLEUKIN-8 PRECURSOR  
20 Phosphotyrosine independent ligand p62 for the Lck SH2 domain mRNA  
21 Uridine phosphorylase  
22 CTSD Cathepsin D (lysosomal aspartyl protease)  
23 FOS-RELATED ANTIGEN 2  
24 PRKCD Protein kinase C, delta  
25 PTGS2 Prostaglandin-endoperoxide synthase 2 (prostaglandin G/H synthase and cyclooxygenase)  
26 Cyclooxygenase-2 (hCox-2) gene  
27 PTX3 Pentaxin-related gene, rapidly induced by IL-1 beta  
28 Amphiregulin (AR) gene  
29 Cyclooxygenase-2 (hCox-2) gene  
30 PEPTIDYL-PROLYL CIS-TRANS ISOMERASE, MITOCHONDRIAL PRECURSOR  
31 GB DEF = PTX3 gene promotor region  
32 GRO2 GRO2 oncogene  
33 Zinc finger transcription factor hEZF (EZF) mRNA  
34 CA2 Carbonic anhydrase II  
35 Interleukin 8 (IL8) gene  
36 Fc-epsilon-receptor gamma-chain mRNA  
37 Myeloid progenitor inhibitory factor-1 MPIF-1 mRNA  
38 AFFX-HUMTFRR/M11507\_M\_at (endogenous control)  
39 C-myb gene extracted from Human (c-myb) gene, complete primary cds, and five complete alternatively spliced cds  
40 THBS1 Thrombospondin 1  
41 SOD2 Superoxide dismutase 2, mitochondrial  
42 ALDR1 Aldehyde reductase 1 (low Km aldose reductase)  
43 ADM Adrenomedullin  
44 HLA-DRB1 Major histocompatibility complex, class II, DR beta 1  
45 SELL Leukocyte adhesion protein beta subunit  
46 PRG1 Proteoglycan 1, secretory granule  
47 IL6 Interleukin 6 (B cell stimulatory factor 2)  
48 GB DEF = GPSAT=glycophorin SAT [human, peripheral bloods, mRNA Partial, 407 nt]  
49 Inducible protein mRNA

50 SNRPN Small nuclear ribonucleoprotein polypeptide N  
51 HOXA9 Homeo box A9  
52 Putative cyclin G1 interacting protein mRNA, partial sequence  
53 ELA2 Elastase 2, neutrophil  
54 NADPH-flavin reductase  
55 CATHEPSIN G PRECURSOR  
56 SPTAN1 Spectrin, alpha, non-erythrocytic 1 (alpha-fodrin)  
57 LYZ Lysozyme  
58 LEUKOCYTE ELASTASE INHIBITOR  
59 KIAA0022 gene  
60 GB DEF = Selenium-binding protein (hSBP) mRNA  
61 PAI2 Plasminogen activator inhibitor, type II (arginine-serpin)  
62 Ninjurin1 mRNA  
63 ANPEP Alanyl (membrane) aminopeptidase (aminopeptidase N,  
aminopeptidase  
M, microsomal aminopeptidase, CD13)  
64 RETINOBLASTOMA BINDING PROTEIN P48  
65 CD44 gene (cell surface glycoprotein CD44) extracted from Human  
hyaluronate receptor (CD44) gene  
66 CHRNA7 Cholinergic receptor, nicotinic, alpha polypeptide 7  
67 PROTEASOME IOTA CHAIN  
68 Serine palmitoyltransferase (LCB2) mRNA, partial cds  
69 SLC4A1 Solute carrier family 4, anion exchanger, member 1  
(erythrocyte  
membrane protein band 3)  
70 AFFX-HUMTFRR/M11507\_3\_at (endogenous control)  
71 Prostate differentiation factor mRNA  
72 GRN Granulin  
73 No cluster in current Unigene and no Genbank entry for U77396  
(qualifier  
U77396\_at)  
74 TCF3 Transcription factor 3 (E2A immunoglobulin enhancer binding  
factors  
E12/E47)  
75 ALDH2 Aldehyde dehydrogenase 2, mitochondrial  
76 Leukotriene C4 synthase (LTC4S) gene  
77 TOP2B Topoisomerase (DNA) II beta (180kD)  
78 LYN V-yes-1 Yamaguchi sarcoma viral related oncogene homolog  
79 Lysozyme gene (EC 3.2.1.17)  
80 LEPR Leptin receptor  
81 Butyrophilin (BTF5) mRNA  
82 ACADM Acyl-Coenzyme A dehydrogenase, C-4 to C-12 straight chain  
83 MYL1 Myosin light chain (alkali)  
84 IL6 Interleukin 6 (B cell stimulatory factor 2)  
85 GB DEF = Neutrophil elastase gene, exon 5  
86 Adenosine triphosphatase, calcium  
87 GOS2 gene extracted from Human GOS2 gene, 5' flank and cds  
88 LGALS3 Lectin, galactoside-binding, soluble, 3 (galectin 3) (NOTE:  
redefinition of symbol)  
89 CTSL Cathepsin L  
90 Oncogene Tls/Chop, Fusion Activated  
91 ADP-ribosylation factor-like protein 4 mRNA  
92 Macmarcks  
93 GB DEF = Uroporphyrinogen decarboxylase (URO-D) gene, partial cds  
94 GB DEF = Homeodomain protein Hoxa9 mRNA  
95 ICAM1 Intercellular adhesion molecule 1 (CD54), human rhinovirus  
receptor  
96 ARHG Ras homolog gene family, member G (rho G)  
97 INDUCED MYELOID LEUKEMIA CELL DIFFERENTIATION PROTEIN MCL1  
98 PI Protease inhibitor 1 (anti-elastase), alpha-1-antitrypsin  
99 MACROPHAGE INFLAMMATORY PROTEIN 1-ALPHA PRECURSOR  
100 PF4 Platelet factor 4  
101 CCND3 Cyclin D3  
102 ERYTHROCYTE PLASMA MEMBRANE 50 KD GLYCOPROTEIN

103 Bcl-2 related (Bfl-1) mRNA  
104 TNF-related apoptosis inducing ligand TRAIL mRNA  
105 GRO3 GRO3 oncogene  
106 VIL2 Villin 2 (ezrin)  
107 EPB42 Erythrocyte membrane protein band 4.2  
108 Oncoprotein 18 (Op18) gene  
109 HU-K4 mRNA  
110 DDH1 Dihydrodiol dehydrogenase  
111 Adrenal-Specific Protein Pg2  
112 LYZ Lysozyme  
113 APLP2 Amyloid beta (A4) precursor-like protein 2  
114 Receptor of retinoic acid  
115 Chorionic Somatomammotropin Hormone Cs-5  
116 GB DEF = Integral membrane protein (NRAMP1) gene, exon 5  
117 CSNK1D Casein kinase 1, delta  
118 CLU Clusterin (complement lysis inhibitor; testosterone-repressed prostate message 2; apolipoprotein J)  
119 ATP6C Vacuolar H+ ATPase proton channel subunit  
120 AHR AH-receptor  
121 Calcyclin  
122 GB DEF = Glycophorin Sta (type A) exons 3 and 4, partial  
123 HMG2 High-mobility group (nonhistone chromosomal) protein 2  
124 PTGER3 Prostaglandin E receptor 3 (subtype EP3) {alternative products}  
125 TUBULIN ALPHA-4 CHAIN  
126 Breast epithelial antigen BA46 mRNA  
127 Transcriptional activator hSNF2b  
128 PLGL Plasminogen-like protein  
129 Ifp35 gene extracted from Human BRCA1, Rho7 and vatI genes, and ipf35 gene, partial cds  
130 TIAL1 TIA1 cytotoxic granule-associated RNA-binding protein-like 1  
131 Integrase gene extracted from Human endogenous retrovirus H clone g10.34 integrase and putative envelope protein genes, partial cds  
132 HLA CLASS II HISTOCOMPATIBILITY ANTIGEN, DQ(W1.1) BETA CHAIN PRECURSOR  
133 PRB2 locus salivary proline-rich protein mRNA, clone cP7  
134 HLA-A MHC class I protein HLA-A (HLA-A28, -B40, -Cw3)  
135 Major Histocompatibility Complex, Class I, C (Gb:X58536)  
136 Natural killer cell receptor (KIR) mRNA  
137 Nkat2b mRNA  
138 CYTOCHROME P450 IA2  
139 GAPD Glyceraldehyde-3-phosphate dehydrogenase  
140 ACTB Actin, beta  
141 GB DEF = H2B/h gene  
142 GB DEF = Transmembrane protein Tmp21-IIex  
143 PRSS3 Protease, serine, 3 (trypsin 3)  
144 GB DEF = Glutamate dehydrogenase  
145 Metallothionein  
146 CYTOCHROME P450 IIA6  
147 GB DEF = Histone H3 gene  
148 KERATIN, TYPE II CYTOSKELETAL 6D  
149 MAGE-5a antigen (MAGE5a) gene  
150 GB DEF = BTF3 protein homologue gene  
151 GB DEF = Histone H2B.1 (H2B) gene  
152 PSG7 Pregnancy-specific beta 1-glycoprotein 7  
153 HLA-DRB1 Major histocompatibility complex, class II, DR beta 5  
154 PRSS1 Protease, serine, 1 (trypsin 1)  
155 S26 from Homo sapiens excision and cross link repair protein (ERCC4) gene, complete genomic sequence./ntype=DNA /annot=exon  
156 KERATIN, TYPE II CYTOSKELETAL 6D  
157 KERATIN, TYPE II CYTOSKELETAL 6D

158 KERATIN, TYPE II CYTOSKELETAL 6D  
159 (clone Hu lambda-17) lambda-like gene  
160 Cytochrome P-450 4 gene  
161 PRH1 Proline-rich protein HaeIII subfamily 1  
162 Chorionic gonadotropin (hcg) beta subunit mRNA  
163 Chorionic gonadotropin beta subunit gene  
164 HLA CLASS II HISTOCOMPATIBILITY ANTIGEN, DQ(1) BETA CHAIN PRECURSOR  
165 Chorionic somatomammotropin CS-1 gene extracted from Human growth hormone (GH-1 and GH-2) and chorionic somatomammotropin (CS-1, CS-2 and CS-5) genes  
166 IFNA21 Interferon, alpha 21  
167 Proline-Rich Protein Prb4, Allele  
168 Luteinizing Hormone, Beta Subunit  
169 Major Histocompatibility Complex, Class I, E (Gb:M21533)  
170 Major Histocompatibility Complex, Class I, E (Gb:M20022)  
171 Transcription Factor Btf3b  
172 PMS8 mRNA (yeast mismatch repair gene PMS1 homologue), partial cds (Cterminal region)  
173 PMS8 mRNA (yeast mismatch repair gene PMS1 homologue), partial cds (Cterminal region)  
174 HLA-A MHC class I protein HLA-A (HLA-A28,-B40, -Cw3)  
175 GB DEF = Endogenous retroviral H protease/integrase-derived ORF1 mRNA, and putative envelope protein mRNA, partial cds  
176 GB DEF = Omega light chain protein 14.1 (Ig lambda chain related) gene, exon 3  
177 GB DEF = Omega light chain protein 14.1 (Ig lambda chain related) gene, exon 3  
178 GB DEF = Immunoglobulin-related 14.1 protein mRNA  
179 GB DEF = Immunoglobulin-related 14.1 protein mRNA  
180 GB DEF = DNA sequence from PAC 151B14 on chromosome 22q12-qter contains somatostatin receptor subtype 3 (SSTR3), tRNA, ESTs, CpG island and STS  
181 ALPHA-CENTRACTIN  
182 GB DEF = Bone marrow serine protease gene (medullasin) (leukocyte neutrophil elastase gene)  
183 ZNF183 gene  
184 GB DEF = G-protein coupled receptor  
185 GB DEF = R kappa B mRNA  
186 SCYA4 Small inducible cytokine A4 (homologous to mouse Mip-1b)  
187 MYH7 Myosin, heavy polypeptide 7, cardiac muscle, beta  
188 JUNB Jun B proto-oncogene  
189 RD Radin blood group  
190 GABRB1 Gamma-aminobutyric acid (GABA) A receptor, beta 1  
191 RAB2 RAB2, member RAS oncogene family  
192 APS Prostate specific antigen  
193 PRKCB1 Protein kinase C, beta 1  
194 Transcription factor E2F like protein [human, mRNA, 2492 nt]  
195 Protein tyrosine phosphatase sigma mRNA  
196 Estrogen sulfotransferase mRNA  
197 GARS Glycyl-tRNA synthetase  
198 Homolog of Drosophila enhancer of split m9/m10 mRNA  
199 Transcription factor LSF mRNA  
200 ARAF1 V-raf murine sarcoma 3611 viral oncogene homolog 1  
201 CD19 CD19 antigen  
202 GAP43 Growth associated protein 43  
203 NPPB Natriuretic peptide precursor B  
204 DNA-BINDING PROTEIN A  
205 SELL Leukocyte adhesion protein beta subunit

206 AVPR1B Arginine vasopressin receptor 1B  
207 Autotaxin mRNA  
208 H2K binding factor 2 (KBF2) mRNA  
209 mRNA fragment encoding beta-tubulin. (from clone D-beta-1)  
210 GB DEF = HH2B/d gene  
211 H4/j gene  
212 GB DEF = H2B/l gene  
213 H2B/j gene  
214 HD21 mRNA  
215 GB DEF = Chloride channel (putative) 2163bp  
216 GB DEF = Chloride channel (putative) 2139bp  
217 NGAL gene  
218 Ubiquitin hydrolase  
219 GB DEF = RagB protein  
220 GB DEF = Anion exchange protein  
221 GLUL Glutamate-ammonia ligase (glutamine synthase)  
222 RPS26 Ribosomal protein S26  
223 ZNF37A Zinc finger protein 37a (KOX 21)  
224 L2-9 transcript of unrearranged immunoglobulin V(H)5 pseudogene  
225 ECRP gene for eosinophil cationic related protein  
226 HLA CLASS I HISTOCOMPATIBILITY ANTIGEN, F ALPHA CHAIN PRECURSOR  
227 Alpha-tubulin mRNA  
228 Clone 61501 defective mariner transposon Hsmar2 mRNA sequence  
229 Death domain containing protein CRADD mRNA  
230 GB DEF = Immunoglobulin-like transcript-3 mRNA  
231 Steroidogenic factor 1 mRNA  
232 TRY8 gene (trypsinogen E) extracted from Human germline T-cell  
receptor  
beta chain TCRBV17S1A1T, TCRBV2S1, TCRBV10S1P, TCRBV29S1P, TCRBV19S1P,  
TCRBV15S1, TCRBV11S1A1T, HVB relic, TCRBV28S1P, TCRBV34S1, TCRBV14S1,  
TCRBV3S1,  
TCRBV4S1A1T, TRY4, TRY5, TRY6, T  
233 GB DEF = Mitochondrial trifunctional protein beta subunit mRNA,  
partial  
cds  
234 GB DEF = Small GTP binding protein Rab9 mRNA  
235 GB DEF = Beta-2 integrin alphaD subunit (ITGAD) gene, exons 25-30,  
and  
partial cds  
236 ICH-2 PROTEASE PRECURSOR  
237 Uridine diphosphoglucose pyrophosphorylase mRNA  
238 Serine kinase (hPAK65) mRNA, partial cds  
239 GB DEF = Anti-B cell autoantibody IgM heavy chain variable V-D-J  
region  
(VH4) gene, clone E11, VH4-63 non-productive rearrangement  
240 CELLULAR NUCLEIC ACID BINDING PROTEIN  
241 Tyrosine kinase receptor p145TRK-B (TRK-B) mRNA  
242 FLT3LG Fms-related tyrosine kinase 3 ligand  
243 Delta-globin gene extracted from Human beta globin region on  
chromosome 11  
244 GIF=growth inhibitory factor [human, brain, Genomic, 2015 nt]  
245 GB DEF = Transducin-like enhancer protein (TLE4) mRNA, 3' end  
246 TRANSDUCIN-LIKE ENHANCER PROTEIN 1  
247 COL16A1 Alpha-1 type XVI collagen  
248 GB DEF = Histone H3.1 (H1F3) gene  
249 FCGR2A Fc fragment of IgG, low affinity IIa, receptor for (CD32)  
250 PULMONARY SURFACTANT-ASSOCIATED PROTEIN A PRECURSOR  
251 AR Androgen receptor (dihydrotestosterone receptor; testicular  
feminization; spinal and bulbar muscular atrophy; Kennedy disease)  
252 Metallothionein I-B gene  
253 Skeletal beta-tropomyosin  
254 Metallothionein-Ie gene (hMT-Ie)  
255 HMR Hormone receptor (growth factor-inducible nuclear protein N10)  
256 Regenerating protein I beta

257 GB DEF = Small proline-rich protein 1 (SPRR1A) gene  
258 HPR gene (haptoglobin-related protein) extracted from Human  
haptoglobin  
gene (alpha-2 allele)  
259 REG1A Regenerating islet-derived 1 alpha (pancreatic stone protein,  
pancreatic thread protein)  
260 (clone 14VS) metallothionein-IG (MT1G) gene  
261 Mucin 6, Gastric (Gb:L07518)  
262 Sodium Channel 1  
263 Tubulin, Beta  
264 Olfactory Receptor Or17-24  
265 Myosin, Heavy Polypeptide 9, Non-Muscle  
266 Tubulin, Beta 2  
267 NAK1 mRNA for DNA binding protein  
268 GB DEF = Facioscapulohumeral muscular dystrophy (FSHD) gene region,  
D4Z4  
tandem repeat unit  
269 ZNF43 Zinc finger protein 43 (HTF6)  
270 GYPB Glycophorin B  
271 Major Histocompatibility Complex, Class Ii, Dr Beta 2 (Gb:X65561)  
272 Homeotic Protein C6, Class I  
273 Major Histocompatibility Complex, Class I (Gb:X12432)  
274 Major Histocompatibility Complex, Class Ii Beta W52  
275 Neurofibromatosis 2 Tumor Suppressor (Gb:L27065)  
276 Nadh-Ubiquinone Oxidoreductase, 39 Kda Subunit  
277 Mucin 3, Intestinal (Gb:M55406)  
278 GB DEF = DNA mismatch repair protein (hMLH1) mRNA, alternatively  
spliced,  
partial cds  
279 PDE4C Phosphodiesterase 4C, cAMP-specific (dunce (Drosophila)-  
homolog  
phosphodiesterase E1)  
280 Exon 1b; used only in type 2 transcripts from H.sapiens dbi/acbp  
gene  
exon 1 & 2./ntype=DNA /annot=exon  
281 GB DEF = Nonmuscle myosin heavy chain IIB gene, promoter region and  
exon 1  
282 DMA gene extracted from H.sapiens DMA, DMB, HLA-Z1, IPP2, LMP2,  
TAP1,  
LMP7, TAP2, DOB, DQB2 and RING8, 9, 13 and 14 genes  
283 DMA gene extracted from H.sapiens DMA, DMB, HLA-Z1, IPP2, LMP2,  
TAP1,  
LMP7, TAP2, DOB, DQB2 and RING8, 9, 13 and 14 genes  
284 Butyrophilin (BTF4) mRNA  
285 GB DEF = Neurofilament triplet L protein mRNA, partial cds  
286 Krueppel-related zinc finger protein (H-plk) mRNA  
287 GB DEF = Unproductively rearranged Ig mu-chain mRNA V-region (VD),  
5' end,  
clone mu-3A1A  
288 ZNF91 Zinc finger protein 91 (HPF7, HTF10)  
289 ZNF91 Zinc finger protein 91 (HPF7, HTF10)  
290 Small Nuclear Ribonucleoprotein U1, lsnrp  
291 Small Nuclear Ribonucleoprotein U1, lsnrp  
292 Zinc Finger Protein (Gb:M88357)  
293 Spliceosomal Protein Sap 62  
294 Potassium Channel Protein (Gb:Z11585)  
295 Mucin 3, Intestinal (Gb:M55405)  
296 Mucin 3, Intestinal (Gb:M55405)  
297 GB DEF = Alpha satellite and satellite 3 junction DNA sequence  
298 Ins(1,3,4,5)P4-binding protein  
299 BETA-2-MICROGLOBULIN PRECURSOR  
300 AKT2 V-akt murine thymoma viral oncogene homolog 2
