# Supplementary material for: A unified framework for finding differentially expressed genes from microarray experiments
Source: PubMed Central journal article supplement (PMC2099446; doi:10.1186/1471-2105-8-347), 2007-09-18
Supplement: 1471-2105-8-347-S4.pdf [file 1471-2105-8-347-S4.pdf]

## Differentially expressed genes for Gastric cancer data

| Rank | Gene Name               |
|------|-------------------------|
| 1    | GENE5431X IMAGE:1600221 |
| 2    | GENE525X IMAGE:245990   |
| 3    | GENE3133X IMAGE:202535  |
| 4    | GENE1810X IMAGE:795755  |
| 5    | GENE1401X IMAGE:39593   |
| 6    | GENE1721X IMAGE:838285  |
| 7    | GENE5854X IMAGE:2250736 |
| 8    | GENE3355X IMAGE:119289  |
| 9    | GENE1257X IMAGE:78353   |
| 10   | GENE5777X IMAGE:240183  |
| 11   | GENE2267X IMAGE:785707  |
| 12   | GENE5486X IMAGE:119290  |
| 13   | GENE863X IMAGE:139009   |
| 14   | GENE6052X IMAGE:1899312 |
| 15   | GENE5258X IMAGE:1900149 |
| 16   | GENE610X IMAGE:487948   |
| 17   | GENE3624X IMAGE:68637   |
| 18   | GENE2386X IMAGE:232586  |
| 19   | GENE1135X IMAGE:785690  |
| 20   | GENE2960X IMAGE:796123  |
| 21   | GENE2477X IMAGE:898035  |
| 22   | GENE2705X IMAGE:898221  |
| 23   | GENE676X IMAGE:288961   |
| 24   | GENE63X IMAGE:244147    |
| 25   | GENE1960X IMAGE:1584859 |
| 26   | GENE5963X IMAGE:1899496 |
| 27   | GENE6667X IMAGE:785585  |
| 28   | GENE6209X IMAGE:1663354 |
| 29   | GENE2947X IMAGE:140301  |
| 30   | GENE5049X IMAGE:1899230 |
| 31   | GENE3430X IMAGE:127486  |
| 32   | GENE4882X IMAGE:725405  |
| 33   | GENE1226X IMAGE:194515  |
| 34   | GENE2560X IMAGE:280683  |
| 35   | GENE3465X IMAGE:823615  |
| 36   | GENE5619X IMAGE:1659533 |
| 37   | GENE999X IMAGE:705274   |
| 38   | GENE2257X IMAGE:796083  |
| 39   | GENE744X IMAGE:795585   |
| 40   | GENE385X IMAGE:126887   |
| 41   | GENE5807X IMAGE:2067500 |
| 42   | GENE4403X IMAGE:745525  |
| 43   | GENE3454X IMAGE:50531   |
| 44   | GENE5895X IMAGE:2310169 |
| 45   | GENE5193X IMAGE:199648  |
| 46   | GENE1965X IMAGE:770581  |
| 47   | GENE2554X IMAGE:781047  |
| 48   | GENE2088X IMAGE:296095  |
| 49   | GENE2727X IMAGE:1101643 |
| 50   | GENE2789X IMAGE:248256  |
| 51   | GENE5525X IMAGE:1593010 |
| 52   | GENE1508X IMAGE:362402  |
| 53   | GENE5769X IMAGE:2308409 |
| 54   | GENE494X IMAGE:27277    |
| 55   | GENE2041X IMAGE:297392  |
| 56   | GENE5627X IMAGE:1585952 |
| 57   | GENE1612X IMAGE:1031963 |
| 58   | GENE2695X IMAGE:250654  |
| 59   | GENE5930X IMAGE:1554962 |

60 GENE107X IMAGE:214162  
61 GENE6208X IMAGE:1901472  
62 GENE5079X IMAGE:1909163  
63 GENE1952X IMAGE:144786  
64 GENE253X IMAGE:491692  
65 GENE959X IMAGE:142788  
66 GENE5504X IMAGE:1669672  
67 GENE5554X IMAGE:1609752  
68 GENE1250X IMAGE:345538  
69 GENE1069X IMAGE:840726  
70 GENE5559X IMAGE:1571913  
71 GENE2443X IMAGE:240648  
72 GENE1208X IMAGE:39973  
73 GENE4133X IMAGE:281908  
74 GENE6471X IMAGE:755238  
75 GENE1153X IMAGE:841070  
76 GENE2407X IMAGE:265102  
77 GENE96X IMAGE:756402  
78 GENE3442X IMAGE:131316  
79 GENE4008X IMAGE:40031  
80 GENE1356X IMAGE:769686  
81 GENE1655X IMAGE:511820  
82 GENE5866X IMAGE:1893136  
83 GENE993X IMAGE:896962  
84 GENE874X IMAGE:843049  
85 GENE144X IMAGE:191664  
86 GENE1428X IMAGE:80948  
87 GENE3307X IMAGE:785701  
88 GENE1544X IMAGE:788256  
89 GENE4102X IMAGE:462603  
90 GENE1507X IMAGE:200402  
91 GENE1517X IMAGE:294273  
92 GENE5074X IMAGE:1536451  
93 GENE1619X IMAGE:1457341  
94 GENE6560X IMAGE:153505  
95 GENE2514X IMAGE:725454  
96 GENE1908X IMAGE:188232  
97 GENE2103X IMAGE:665379  
98 GENE2656X IMAGE:79592  
99 GENE5086X IMAGE:126458  
100 GENE5450X IMAGE:1639531  
101 GENE239X IMAGE:784126  
102 GENE1432X IMAGE:346696  
103 GENE5567X IMAGE:1540227  
104 GENE1794X IMAGE:30114  
105 GENE493X IMAGE:322511  
106 GENE6602X IMAGE:731095  
107 GENE2466X IMAGE:144881  
108 GENE1772X IMAGE:772880  
109 GENE5565X IMAGE:1555659  
110 GENE4423X IMAGE:825076  
111 GENE3360X IMAGE:840493  
112 GENE4794X IMAGE:1493107  
113 GENE434X IMAGE:357465  
114 GENE4972X IMAGE:984370  
115 GENE2209X IMAGE:491478  
116 GENE6202X IMAGE:1660409  
117 GENE2886X IMAGE:770192  
118 GENE1700X IMAGE:595090  
119 GENE1675X IMAGE:275738  
120 GENE3057X IMAGE:155768  
121 GENE2152X IMAGE:232772  
122 GENE732X IMAGE:186682  
123 GENE5340X IMAGE:135238

124 GENE5104X IMAGE:1947911  
125 GENE1317X IMAGE:247117  
126 GENE721X IMAGE:812968  
127 GENE1694X IMAGE:1605153  
128 GENE4224X IMAGE:399390  
129 GENE225X IMAGE:925538  
130 GENE1194X IMAGE:955521  
131 GENE3638X IMAGE:545749  
132 GENE5589X IMAGE:1570427  
133 GENE3524X IMAGE:46376  
134 GENE4636X IMAGE:162718  
135 GENE5637X IMAGE:34031  
136 GENE6288X IMAGE:1518845  
137 GENE1450X IMAGE:298560  
138 GENE4776X IMAGE:489533  
139 GENE4814X IMAGE:856115  
140 GENE1918X IMAGE:209143  
141 GENE4574X IMAGE:258265  
142 GENE6661X IMAGE:1572704  
143 GENE3022X IMAGE:208413  
144 GENE962X IMAGE:215000  
145 GENE5484X IMAGE:1550894  
146 GENE1098X IMAGE:745689  
147 GENE3971X IMAGE:167205  
148 GENE5409X IMAGE:2019011  
149 GENE2433X IMAGE:1046495  
150 GENE592X IMAGE:1568245  
151 GENE4993X IMAGE:26883  
152 GENE3880X IMAGE:1418621  
153 GENE3557X IMAGE:1032056  
154 GENE5445X IMAGE:245351  
155 GENE4106X IMAGE:145310  
156 GENE4259X IMAGE:378433  
157 GENE2463X IMAGE:1699107  
158 GENE4023X IMAGE:460435  
159 GENE5148X IMAGE:1572723  
160 GENE795X IMAGE:117806  
161 GENE2602X IMAGE:261472  
162 GENE2013X IMAGE:1606304  
163 GENE2414X IMAGE:857324  
164 GENE2360X IMAGE:461761  
165 GENE3731X IMAGE:487932  
166 GENE1790X IMAGE:154172  
167 GENE5058X IMAGE:448093  
168 GENE2932X IMAGE:780994  
169 GENE3702X IMAGE:814431  
170 GENE3379X IMAGE:1415916  
171 GENE5959X IMAGE:1754220  
172 GENE5848X IMAGE:2244718  
173 GENE5602X IMAGE:1435103  
174 GENE1906X IMAGE:129585  
175 GENE4363X IMAGE:146882  
176 GENE6614X IMAGE:784129  
177 GENE6673X IMAGE:592592  
178 GENE4954X IMAGE:415046  
179 GENE1093X IMAGE:322175  
180 GENE3039X IMAGE:460487  
181 GENE5463X IMAGE:841326  
182 GENE985X IMAGE:162778  
183 GENE277X IMAGE:504785  
184 GENE4540X IMAGE:289653  
185 GENE3491X IMAGE:284882  
186 GENE5912X IMAGE:1913928  
187 GENE2208X IMAGE:195712

188 GENE2590X IMAGE:785542  
189 GENE5436X IMAGE:1636181  
190 GENE4519X IMAGE:740965  
191 GENE6370X \*mitoch. cont. IMAGE:1862251  
192 GENE5508X IMAGE:512061  
193 GENE4502X IMAGE:1583501  
194 GENE4265X IMAGE:396358  
195 GENE4132X IMAGE:462983  
196 GENE6308X IMAGE:1899292  
197 GENE5797X IMAGE:1851004  
198 GENE29X IMAGE:46694  
199 GENE408X IMAGE:51865  
200 GENE3040X IMAGE:66534  
201 GENE6633X IMAGE:810391  
202 GENE6058X IMAGE:1710872  
203 GENE4976X IMAGE:471823  
204 GENE2245X IMAGE:200396  
205 GENE944X IMAGE:49970  
206 GENE4394X IMAGE:51275  
207 GENE4345X IMAGE:1420830  
208 GENE5636X IMAGE:1540436  
209 GENE5393X IMAGE:1643566  
210 GENE1484X IMAGE:1591477
