# Supplementary material for: A unified framework for finding differentially expressed genes from microarray experiments
Source: PubMed Central journal article supplement (PMC2099446; doi:10.1186/1471-2105-8-347), 2007-09-18
Supplement: 1471-2105-8-347-S6.pdf [file 1471-2105-8-347-S6.pdf]

## Differentially expressed genes for Colon cancer data

1 Hsa.8125 T71025 3' UTR 1 84103 Human (HUMAN);.  
2 Hsa.2361 T51534 3' UTR 1 72396 CYSTATIN C PRECURSOR (HUMAN).  
3 Hsa.558 R34698 3' UTR 1 136738 INTERFERON-INDUCIBLE PROTEIN 9-27 (HUMAN);.  
4 Hsa.692 M76378 gene 1 "Human cysteine-rich protein (CRP) gene, exons 5 and 6."  
5 Hsa.8147 M63391 gene 1 "Human desmin gene, complete cds."  
6 Hsa.692 M76378 gene 1 "Human cysteine-rich protein (CRP) gene, exons 5 and 6."  
7 Hsa.43279 H64489 3' UTR 2a 238846 LEUKOCYTE ANTIGEN CD37 (Homo sapiens)  
8 Hsa.2795 X15183 gene 1 Human mRNA for 90-kDa heat-shock protein.  
9 Hsa.2126 D26129 gene 1 RIBONUCLEASE PANCREATIC PRECURSOR (HUMAN);contains element MER21 repetitive element ;.  
10 Hsa.821 X14958 gene 1 Human hmgI mRNA for high mobility group protein Y.  
11 Hsa.36689 Z50753 gene 1 H.sapiens mRNA for GCAPII/uroguanylin precursor.  
12 Hsa.3152 D31885 gene 1 "Human mRNA (KIAA0069) for ORF (novel proetin), partial cds."  
13 Hsa.24506 R44418 3' UTR 2a 34853 EBNA-2 NUCLEAR PROTEIN (Epstein-barr virus)  
14 Hsa.879 H41129 3' UTR 1 175539 GALECTIN-1 (HUMAN);contains Alu repetitive element;.  
15 Hsa.37937 R87126 3' UTR 2a 197371 "MYOSIN HEAVY CHAIN, NONMUSCLE (Gallus gallus)"  
16 Hsa.831 M22382 gene 1 MITOCHONDRIAL MATRIX PROTEIN P1 PRECURSOR (HUMAN);.  
17 Hsa.36665 U31215 gene 1 "Human metabotropic glutamate receptor 1 alpha (mGluR1alpha) mRNA, complete cds."  
18 Hsa.8052 T48014 3' UTR 1 72078 HEMOGLOBIN ALPHA CHAIN (HUMAN).  
19 Hsa.3306 X12671 gene 1 Human gene for heterogeneous nuclear ribonucleoprotein (hnRNP) core protein A1.  
20 Hsa.2646 X68277 gene 1 H.sapiens CL 100 mRNA for protein tyrosine phosphatase.  
21 Hsa.3305 X12369 gene 1 "TROPOMYOSIN ALPHA CHAIN, SMOOTH MUSCLE (HUMAN);."  
22 Hsa.692 M76378 gene 1 "Human cysteine-rich protein (CRP) gene, exons 5 and 6."  
23 Hsa.773 H40095 3' UTR 1 175181 MACROPHAGE MIGRATION INHIBITORY FACTOR (HUMAN);.  
24 Hsa.2863 X70326 gene 1 H.sapiens MacMarcks mRNA.  
25 Hsa.3349 X15882 gene 1 Human mRNA for collagen VI alpha-2 C-terminal globular domain.  
26 Hsa.316 M94132 gene 1 Human mucin 2 (MUC2) mRNA sequence.  
27 Hsa.41280 Z49269 gene 1 H.sapiens gene for chemokine HCC-1.

28 Hsa.1131 T92451 3' UTR 1 118219 "TROPOMYOSIN, FIBROBLAST AND EPITHELIAL MUSCLE-TYPE (HUMAN);.  
"

29 Hsa.41280 Z49269 gene 1 H.sapiens gene for chemokine HCC-1.

30 Hsa.8374 T59162 3' UTR 2a 74635 SELENIUM-BINDING PROTEIN (Mus musculus)

31 Hsa.36952 H43887 3' UTR 2a 183264 COMPLEMENT FACTOR D PRECURSOR (Homo sapiens)

32 Hsa.3068 X16356 gene 1 Human mRNA for transmembrane carcinoembryonic antigen BGPC (part.) (formerly TM3-CEA).

33 Hsa.3331 T86473 3' UTR 1 114645 NUCLEOSIDE DIPHOSPHATE KINASE A (HUMAN);.  
"

34 Hsa.549 R36977 3' UTR 1 26045 P03001 TRANSCRIPTION FACTOR IIIA ;.  
"

35 Hsa.579 M80815 gene 1 "H.sapiens a-L-fucosidase gene, exon 7 and 8, and complete cds.  
"

36 Hsa.41338 D31716 gene 1 "Human mRNA for GC box bindig protein, complete cds.  
"

37 Hsa.3648 T56690 3' UTR 2a 69419 CHLORINE CHANNEL PROTEIN P64 (Bos taurus)

38 Hsa.2553 X74295 gene 1 H.sapiens mRNA for alpha 7B integrin.

39 Hsa.5211 R67358 3' UTR 2a 141200 MAP KINASE PHOSPHATASE-1 (Homo sapiens)

40 Hsa.341 M26683 gene 1 Human interferon gamma treatment inducible mRNA.

41 Hsa.2967 X75208 gene 1 H.sapiens HEK2 mRNA for protein tyrosine kinase receptor.

42 Hsa.449 H58397 3' UTR 1 205866 "TRANS-1,2-DIHYDROBENZENE-1,2-DIOL DEHYDROGENASE (HUMAN);.  
"

43 Hsa.1902 L05144 gene 1 "PHOSPHOENOLPYRUVATE CARBOXYKINASE, CYTOSOLIC (HUMAN);contains Alu repetitive element;contains element PTR5 repetitive element ;.  
"

44 Hsa.2715 H77597 3' UTR 1 214162 H.sapiens mRNA for metallothionein (HUMAN);.  
"

45 Hsa.31630 R64115 3' UTR 2a 139618 ADENOSYLHOMOCYSTEINASE (Homo sapiens)

46 Hsa.1832 J02854 gene 1 "MYOSIN REGULATORY LIGHT CHAIN 2, SMOOTH MUSCLE ISOFORM (HUMAN);contains element TAR1 repetitive element ;.  
"

47 Hsa.2344 X86693 gene 1 H.sapiens mRNA for hevin like protein.

48 Hsa.43405 H81558 3' UTR 2a 238704 PROCYCLIC FORM SPECIFIC POLYPEPTIDE B1-ALPHA PRECURSOR (Trypanosoma brucei brucei)

49 Hsa.9994 T51539 3' UTR 2a 72395 HEPATOCYTE GROWTH FACTORLIKE PROTEIN PRECURSOR (Homo sapiens) --68dd\_5699-4733\_4d62-1290\_1927  
Contentype:  
application/octet-stream Content-Transfer-Encoding: 7bit Content-MD5: NAlwVJQ4msWkg7LKaY/Asw== Content-Description: rank2b.info

50 Hsa.2097 M36634 gene 1 "Human vasoactive intestinal peptide (VIP) mRNA, complete cds.  
"

51 Hsa.1240 M31994 gene 1 "Human cytosolic aldehyde dehydrogenase (ALDH1) gene, exon 13.  
"

52 Hsa.44350 H79136 3' UTR 2a 235022 ALPHA-2-MACROGLOBULIN

PRECURSOR (Homo sapiens)  
53 Hsa.14069 T67077 3' UTR 2a 66563 SODIUM/POTASSIUMTRANSPORTING  
ATPASE GAMMA CHAIN (Ovis aries)  
54 Hsa.6904 T48692 3' UTR 2a 69935 ALPHA-2A ADRENERGIC  
RECEPTOR (Homo sapiens)  
55 Hsa.230 U05291 gene 1 "Human fibromodulin mRNA, partial  
cds."  
56 Hsa.8223 T94350 3' UTR 2a 119711 PERIPHERAL MYELIN PROTEIN  
22 (Homo sapiens)  
57 Hsa.601 J05032 gene 1 "Human aspartyl-tRNA synthetase  
alpha-2 subunit mRNA, complete cds."  
58 Hsa.6814 H08393 3' UTR 2a 45395 COLLAGEN ALPHA 2(XI) CHAIN  
(Homo sapiens)  
59 Hsa.2291 H06524 3' UTR 1 44386 "GELSOLIN PRECURSOR,  
PLASMA (HUMAN);."  
60 Hsa.25322 R44301 3' UTR 2a 34262 MINERALOCORTICOID RECEPTOR  
(Homo sapiens)  
61 Hsa.2456 U25138 gene 1 "Human MaxiK potassium  
channel beta subunit mRNA, complete cds."  
62 Hsa.466 U19969 gene 1 "Human two-handed zinc finger  
protein ZEB mRNA, partial cds."  
63 Hsa.72 D29808 gene 1 "Human mRNA for T-cell acute  
lymphoblastic leukemia associated antigen 1 (TALLA-1), complete cds."  
64 Hsa.11616 T60778 3' UTR 2a 76539 MATRIX GLA-PROTEIN  
PRECURSOR (Rattus norvegicus)  
65 Hsa.33 M64110 gene 1 "Human caldesmon mRNA, complete  
cds."  
66 Hsa.41260 L11706 gene 1 "Human hormone-sensitive  
lipase (LIPE) gene, complete cds."  
"
