# Supplementary material for: A unified framework for finding differentially expressed genes from microarray experiments
Source: PubMed Central journal article supplement (PMC2099446; doi:10.1186/1471-2105-8-347), 2007-09-18
Supplement: 1471-2105-8-347-S7.pdf [file 1471-2105-8-347-S7.pdf]

## Differentially expressed genes for codelink data

| Ser | Index | Gene Name                                                                                                                                             |
|-----|-------|-------------------------------------------------------------------------------------------------------------------------------------------------------|
| 1   | 92    | Cluster Incl D87990:House mouse; Musculus domesticus mRNA for UDP-galactose transporter related isozyme 1, complete cds /cds=(88,1056) /gb=D87990 /gi |
| 2   | 363   | Incl X02463:Mouse germline immunoglobulin V(H)II gene H8 /cds=(0,207) /gb=X02463 /gi=52418 /ug=Mm.88809 /len                                          |
| 3   | 539   | Incl M35725:Mouse Cu-Zn superoxide dismutase mRNA, complete cds /cds=(4,468) /gb=M35725 /gi=192929 /ug=Mm.5274 /                                      |
| 4   | 1931  | Incl L41495:Mus musculus protein-serine/threonine kinase (pim-2) mRNA, complete cds /cds=UNKNOWN /gb=L4149                                            |
| 5   | 6002  | 770.6 Cluster Incl AF016697:Duffy blood group /cds=(34,1038) /gb=AF016697 /gi=2454612 /ug=Mm.6393 /len=1174                                           |
| 6   | 6553  | Incl AA200748:mu03a04.r1 Mus musculus cDNA, 5 end /clone=IMAGE-638286 /clone_end=5 /gb=AA200748 /gi=17                                                |
| 7   | 6953  | Incl AI840815:UI-M-AH0-adb-c-03-0-UI.s1 Mus musculus cDNA, 3 end /clone=UI-M-AH0-adb-c-03-0-UI /clone_end=                                            |
| 8   | 8275  | Incl AI849678:UI-M-AL1-ahl-e-08-0-UI.s1 Mus musculus cDNA, 3 end /clone=UI-M-AL1-ahl-e-08-0-UI /clone_end=3                                           |
| 9   | 8909  | Incl AW061324:UI-M-BH1-anw-e-09-0-UI.s1 Mus musculus cDNA, 3 end /clone=UI-M-BH1-anw-e-09-0-UI /clone_en                                              |
| 10  | 9017  | Incl AV280750:AV280750 Mus musculus cDNA, 3 end /clone=4933417D13 /clone_end=3 /gb=AV280750 /gi=626878                                                |
| 11  | 9322  | 4012.2 Cluster Incl AI851081:UI-M-BH0-akg-a-12-0-UI.s1 Mus musculus cDNA, 3 end /clone=UI-M-BH0-akg-a-12-0-UI /clone_end=                             |
| 12  | 10673 | Incl AI849834:UI-M-AL1-aho-h-09-0-UI.s1 Mus musculus cDNA, 3 end /clone=UI-M-AL1-aho-h-09-0-UI /clone_end=3                                           |
| 13  | 11080 | Incl AI286904:ui78d09.y1 Mus musculus cDNA, 5 end /clone=IMAGE-1888529 /clone_end=5 /gb=AI286904 /gi=392                                              |
| 14  | 11516 | Incl AI851048:UI-M-BH0-ajv-f-08-0-UI.s1 Mus musculus cDNA, 3 end /clone=UI-M-BH0-ajv-f-08-0-UI /clone_en=3 ,                                          |
| 15  | 12004 | 1749.2 Cluster Incl U43321 :Frizzled homolog 8, (Drosophila) /cds=(0,2057) /gb=U43321 /gi=1151259 /ug=Mm.57055 /len=2058                              |
| 16  | 12047 | 3153.8 Cluster Incl X70764:ELKL motif kinase /cds=(93,2417) /gb=X70764 /gi=57919 /ug=Mm.4082 /len=2763                                                |
| 17  | 12300 | 834 Cluster Incl AV334165:AV334165 Mus musculus cDNA, 3 end /clone=6330554P20 /clone_end=3 /gb=AV334165 /gi=637421                                    |
