# Supplementary material for: A unified framework for finding differentially expressed genes from microarray experiments
Source: PubMed Central journal article supplement (PMC2099446; doi:10.1186/1471-2105-8-347), 2007-09-18
Supplement: 1471-2105-8-347-S8.pdf [file 1471-2105-8-347-S8.pdf]

## Differentially expressed genes for MAS05 data

| Ser | ind   | Genename/function                                                                                                       |
|-----|-------|-------------------------------------------------------------------------------------------------------------------------|
| 1   | 458   | Incl X84037:M.musculus mRNA for E-selectin ligand-1 /cds=(6,3533) /gb=X84037 /gi=673435 /ug=Mm.488 /len=3887            |
| 2   | 1931  | Incl L41495:Mus musculus protein-serine/threonine kinase (pim-2) mRNA, complete cds /cds=UNKNOWN /gb=L4149              |
| 3   | 1983  | Incl AI840329:UI-M-AJ0-abd-b-03-0-UI.s2 Mus musculus cDNA, 3 end /clone=UI-M-AJ0-abd-b-03-0-UI /clone_end=3 /g          |
| 4   | 2336  | Incl AF059583:Mus musculus docking protein Dok-R mRNA, complete cds /cds=(43,1281) /gb=AF059583 /gi=308859              |
| 5   | 2937  | Incl U15562:Cell division cycle control protein 25C /cds=(319,1662) /gb=U15562 /gi=882119 /ug=Mm.16857 /len=190         |
| 6   | 3372  | 7748 Cluster Incl AI848367:UI-M-AH1-ago-e-07-0-UI.s1 Mus musculus cDNA, 3 end /clone=UI-M-AH1-ago-e-07-0-UI /clone_end= |
| 7   | 3925  | 949.3 Cluster Incl AA656014:vs47g02.r1 Mus musculus cDNA, 5 end /clone=IMAGE-1149458 /clone_end=5 /gb=AA656014 /gi=25   |
| 8   | 4042  | Incl AW045279:UI-M-BH1-akn-c-08-0-UI.s1 Mus musculus cDNA, 3 end /clone=UI-M-BH1-akn-c-08-0-UI /clone_end               |
| 9   | 6953  | Incl AI840815:UI-M-AH0-adb-c-03-0-UI.s1 Mus musculus cDNA, 3 end /clone=UI-M-AH0-adb-c-03-0-UI /clone_end=              |
| 10  | 7731  | Incl U10406:Capping protein beta 1 /cds=(47,880) /gb=U10406 /gi=500746 /ug=Mm.2945 /len=1647                            |
| 11  | 8258  | Incl AI840972:UI-M-AK0-adk-e-04-0-UI.s1 Mus musculus cDNA, 3 end /clone=UI-M-AK0-adk-e-04-0-UI /clone_end=3             |
| 12  | 11032 | 3325.1 Cluster Incl AI882416:uc01c09.r1 Mus musculus cDNA, 5 end /clone=IMAGE-1396720 /clone_end=5 /gb=AI882416 /gi=556 |
| 13  | 12047 | 3153.8 Cluster Incl X70764:ELKL motif kinase /cds=(93,2417) /gb=X70764 /gi=57919 /ug=Mm.4082 /len=2763                  |
| 14  | 12103 | Incl AI835443:UI-M-AQ0-aad-c-02-0-UI.s1 Mus musculus cDNA, 3 end /clone=UI-M-AQ0-aad-c-02-0-UI /clone_end=              |
